# Supplementary material for: Hyaluronic acid-conjugated liposome nanoparticles for targeted delivery to CD44 overexpressing glioblastoma cells
Source: PubMed Central journal article supplement (PMC5085145; doi:10.18632/oncotarget.8926), 2016-04-22
Supplement: oncotarget-07-34158-s001.pdf [file oncotarget-07-34158-s001.pdf]

## Hyaluronic acid-conjugated liposome nanoparticles for targeted delivery to CD44 overexpressing glioblastoma cells

### Supplementary Materials

**Supplementary Table S1: HALNPs temporal stability analysis in the lyophilized state following standard rehydration protocol**

|        | Hydrodynamic Diameter (nm) | Polydispersity Index (PI) |
|--------|----------------------------|---------------------------|
| Day 0  | 167.2 ± 2.3                | 0.185                     |
| Day 30 | 169.2 ± 4.3                | 0.160                     |
| Day 60 | 171.4 ± 6.6                | 0.172                     |

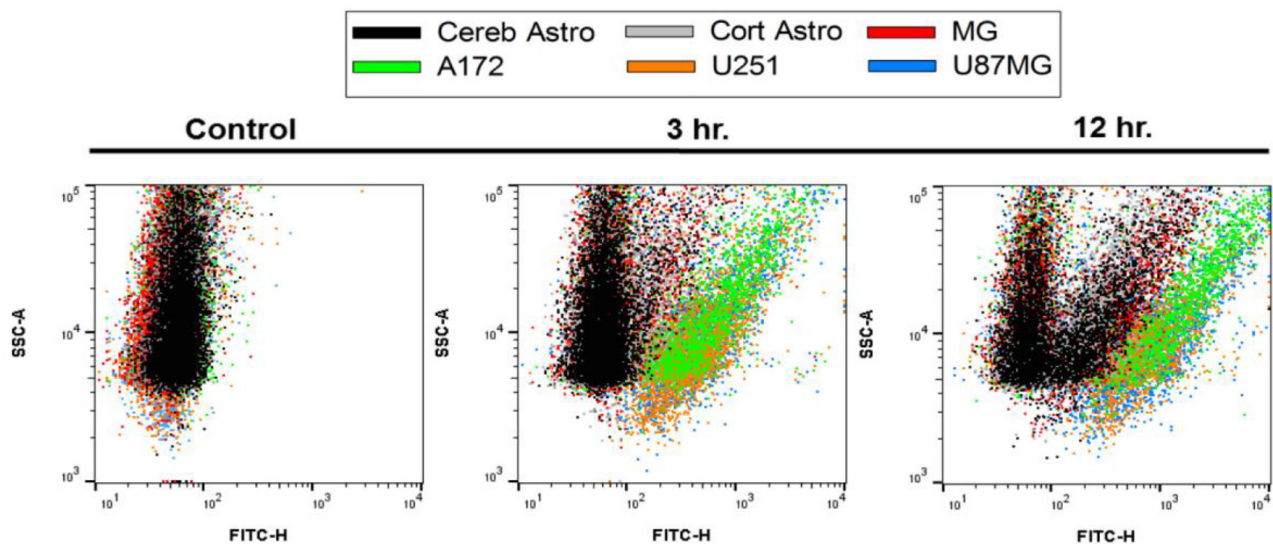

**Supplementary Figure S1: HALNP uptake rate and extent in glioblastoma and healthy glial cells.** Flow cytometry scatter plot analysis was used to display HALNP uptake following a 3 and 12 hour incubation time with the *in vitro* GBM model.

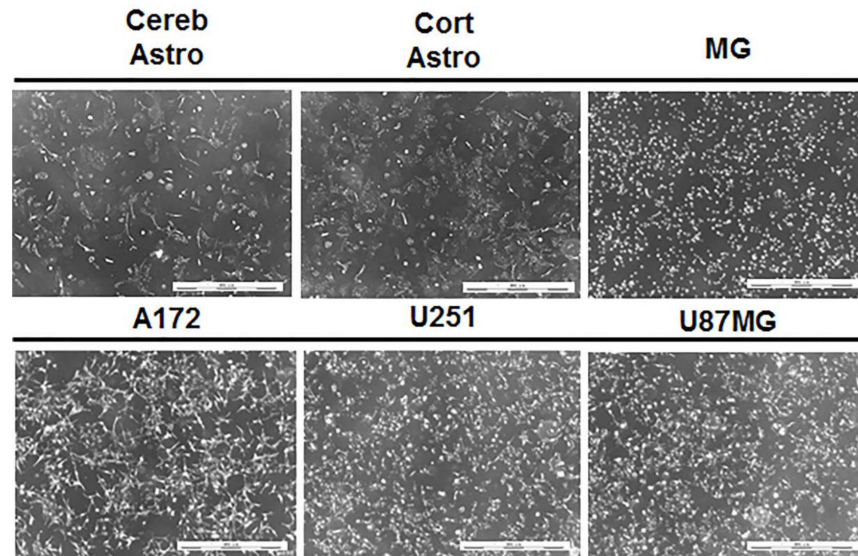

Supplementary Figure S2: Seeding density for flow cytometry experiments. Scale bar is 1000 micron.

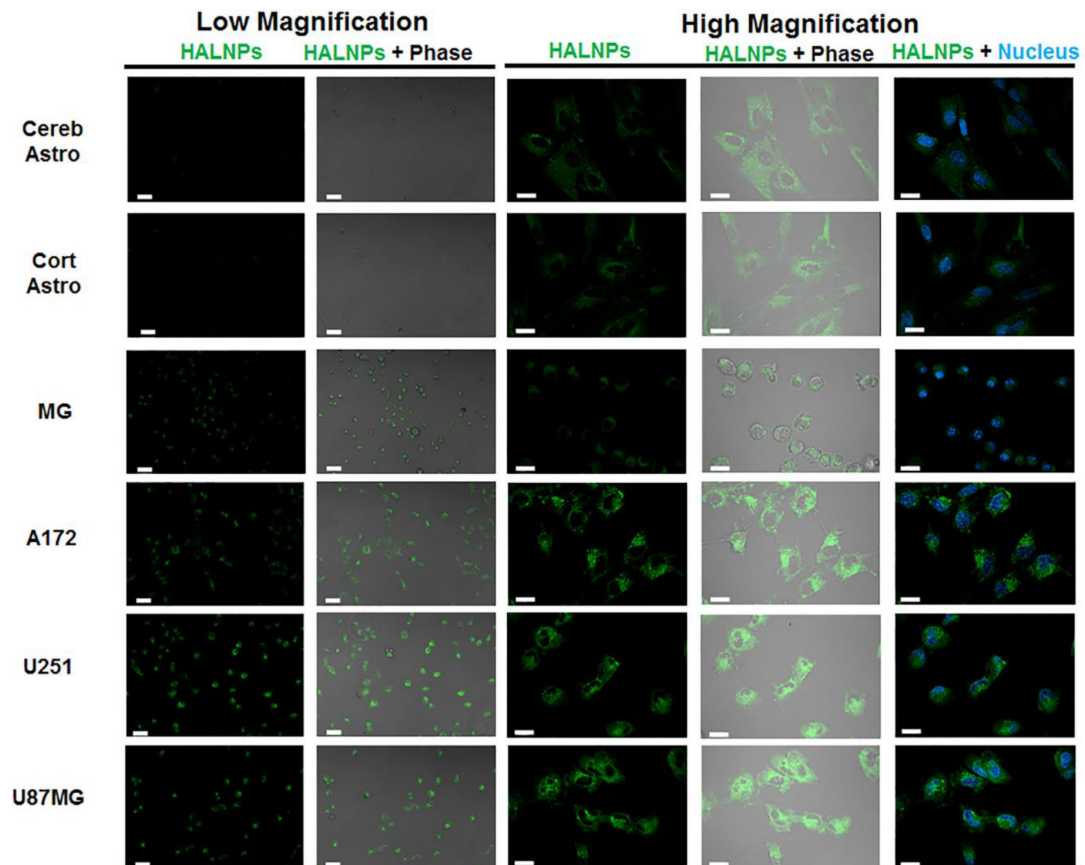

Supplementary Figure S3: Expanded live cell quantitative confocal microscopy analysis of HALNP uptake between healthy glial (Cereb Astro, Cort Astro, and MG) and GBM (A172, U251, U87MG) cells following a five hour incubation time. Low magnification scale bar is 50 micron. High magnification scale bar is 20 micron.

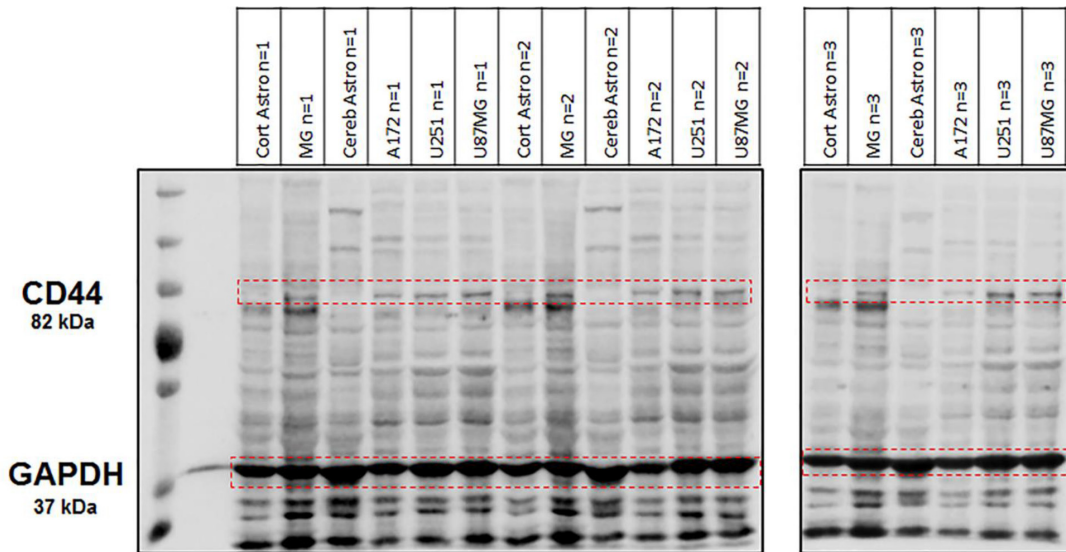

**Supplementary Figure S4: CD44 protein analysis full western blots un-cropped.** CD44 and GAPDH proteins are labeled. The red boxes indicate the protein bands used for quantification;  $n = 3$ .

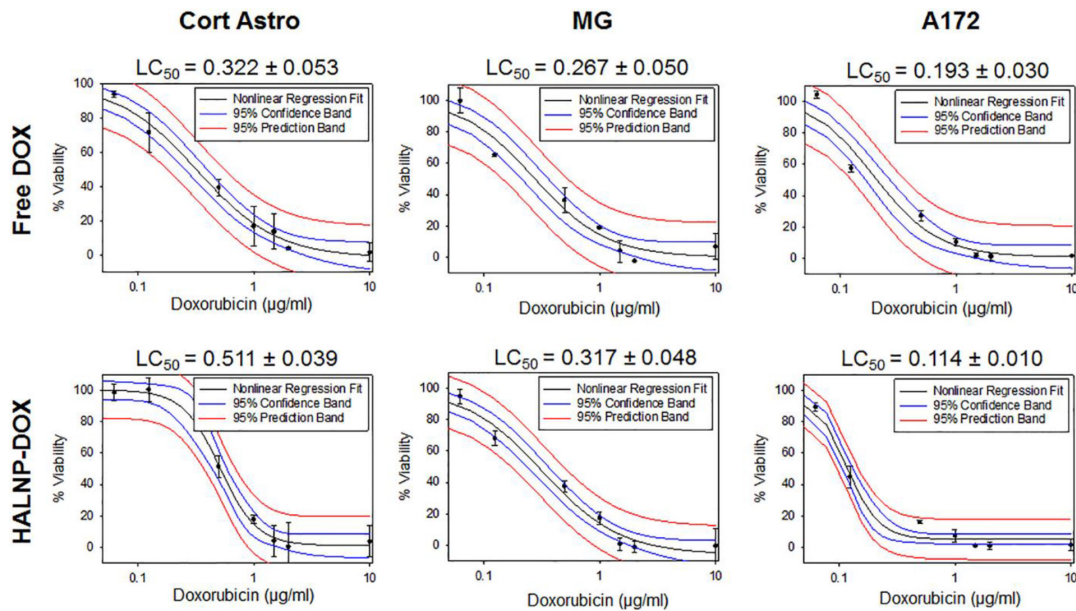

**Supplementary Figure S5: Potency assay  $LC_{50}$  nonlinear regression analysis with both confidence and prediction bands for the 24 hour time point employing Doxorubicin in its free form (Free DOX) and encapsulated inside HALNPs (HALNP-DOX).**

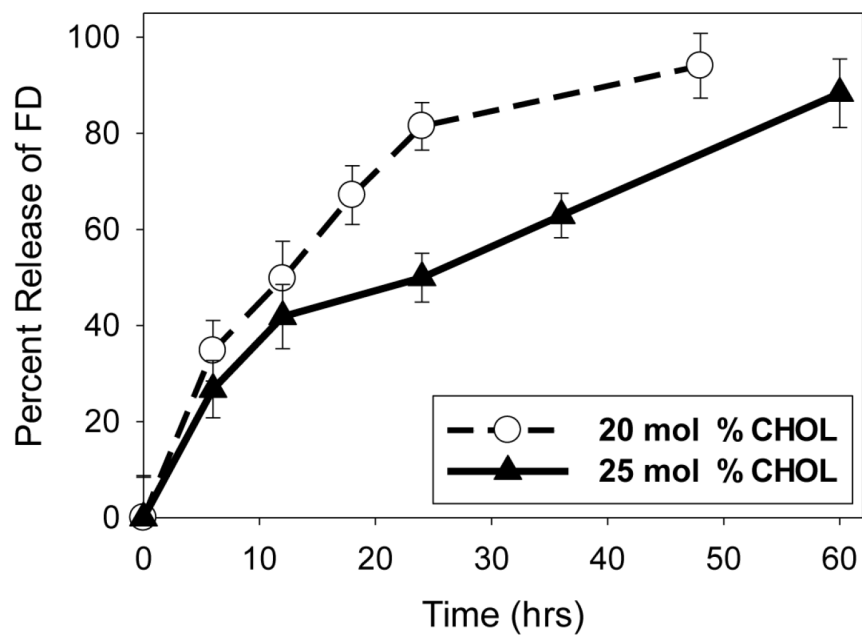

**Supplementary Figure S6: Effect of HALNP cholesterol content on FITC-Tagged Dextran (FD) model drug cargo release.**
